# Supplementary material for: Temporal in vivo platelet labeling in mice reveals age-dependent receptor expression and conservation of specific mRNAs
Source: PubMed Central journal article supplement — Blood Adv. 2022 Aug 30;6(23):6028–38. doi: 10.1182/bloodadvances.2022007099 (PMC9699941; doi:10.1182/bloodadvances.2022007099), 2022-08-30

## **Temporal *in vivo* platelet labelling in mice reveals age-dependent receptor expression and conservation of specific mRNAs**

Paul C Armstrong<sup>1</sup>, Harriet E Allan<sup>1</sup>, Nicholas S Kirkby<sup>2</sup>, Clemens Gutmann<sup>3</sup>, Abhishek Joshi<sup>3</sup>, Marilena Crescente<sup>1,4</sup>, Jane A Mitchell<sup>2</sup>, Manuel Mayr<sup>3</sup>, Timothy D Warner<sup>1</sup>

<sup>1</sup>Centre for Immunobiology, Blizard Institute, Barts and the London School of Medicine and Dentistry, Queen Mary University of London, UK, <sup>2</sup>National Heart & Lung Institute, Imperial College London, UK, <sup>3</sup>King's British Heart Foundation Centre, King's College London, London, UK, <sup>4</sup> Department of Life Sciences, Manchester Metropolitan University, UK

**Short title:** Temporal mouse platelet labelling

**Corresponding Author:** Paul Armstrong ([p.c.armstrong@qmul.ac.uk](mailto:p.c.armstrong@qmul.ac.uk)), Centre for Immunobiology, Blizard Institute, 4 Newark Street, Barts and the London School of Medicine and Dentistry, Queen Mary University of London, London, E1 2AT, UK

# Supplemental Methods

## RNA isolation

RNA was extracted from fluorescent activated cell sorted (FACS; BD FACS Aria II, BD Bioscience; 70µm nozzle, 70 Ps) platelets, using the QIAGEN miRNAEasy mini kit (Cat. No. 217004), following manufacturer's instructions. Sample pellets were lysed in 500 µL of Qiazol at the time of harvest. A mixture of synthetic cel-miR-39-3p (Qiagen, 219600) and MS2 carrier RNA (Roche, 10165948001) was added in a volume of 200 µL QIAzol reagent. Following brief mixing and incubation at room temperature for 5 minutes, 140 µL of chloroform (Fisher Scientific, Cat. No. 12832224) was added and the solution was mixed vigorously for 20 seconds, and further incubated at room temperature for 5 minutes. Samples were then centrifuged at 13,500 x *g* for 15 min at 4°C. 280 µL of upper (aqueous) phase was carefully mixed with 420 µL of 100% ethanol and then applied to columns and washed three times according to the manufacturer's protocol. First, 700 µL of RWT buffer was added, the column centrifuged at 12,000 x *g* for 1 minute, and the flowthrough discarded. Then, 500 µL RPE buffer was added and the columns centrifuged at 13000 x *g* for 1 minute, and the flowthrough again discarded. 500 µL RPE buffer was again added, and the columns centrifuged at 13000 x *g* for 2 minutes. Flowthrough was again discarded. Columns were transferred to a dry collection tube and centrifuged at 15000 x *g* for 1 minute to dry. Finally, RNA was eluted by the addition of 35 µL of nuclease-free H<sub>2</sub>O and centrifugation at 9000 x *g* for 1 min at room temperature into a fresh microcentrifuge tube. RNA samples were stored at -80°C prior to further analysis.

## Reverse transcription

To generate cDNA for gene expression studies, 8 µL of RNA from each sample were combined with 2 µL of SuperScript VILO cDNA Synthesis Kit (Invitrogen, 11755-250) in 96-well plates, centrifuged and incubated on ice for 5 minutes before transferring to a thermocycler for the following protocol:

| Stage | Temp (°C) | Time (min) |
|-------|-----------|------------|
| Mix   | 25        | 10         |
| Hold  | 42        | 120        |
| Melt  | 85        | 5          |
| Hold  | 4         | ∞          |

## RT-qPCR

For RT-qPCR measurements of mRNAs in platelets, the SYBR Select Master Mix (Applied Biosystems, 4472908) and custom-designed primers (Integrated DNA Technologies, see below) were used. Primers were designed to span exon-exon junctions if possible (not possible with *Itga2b*, *Gp9*, *Srgn*, *Gnas*, *Alox12*). Briefly, 2  $\mu$ L of 1:25 diluted cDNA was combined with 2.5  $\mu$ L SYBR Select Master Mix and 0.5  $\mu$ L of primer mix containing 2  $\mu$ M forward primer and 2  $\mu$ M reverse primer, resulting in a total volume of 5  $\mu$ L. A Bravo Automated Liquid Handling Platform (Agilent) was used to prepare the reactions in 384-well plates. All qPCR measurements were performed on a ViiA7 Real-Time PCR System (Applied Biosystems), using the following thermocycler conditions: 50°C for 2 min, 95°C for 2 min, followed by 40 cycles at 95°C for 15 sec and 60°C for 1 min. Data was analysed using ViiA 7 Software (Applied Biosystems).

Data was analysed using ViiA 7 Software (Applied Biosystems) following a standard yield assumption of 100 $\pm$ 5% achieved during the exponential phase. Interplate differences in RT and qPCR efficiencies were mitigated by placing all samples onto the same RT plate as well as the same qPCR plate, thus enabling identical reaction conditions for all samples. Finally old and new platelets were derived from the same 4 donor mice used in this experiment, enabling a paired comparison of old and young platelets in the same mice.

## Primer sequences

| NCBI RefSeq | Target Gene | Description                       | Fwd Primer             | Rev Primer             |
|-------------|-------------|-----------------------------------|------------------------|------------------------|
| NM_007393   | Actb        | beta-actin                        | CACTGTCGAGTCGCGTCC     | TCATCCATGGCGAACTGGTG   |
| NM_007440   | Alox12      | 12-LOX                            | CAACCTAGTGCGTTTGTGGC   | TCGGGAACGTGCGAAGTCAAA  |
| NM_016745   | Atp2a3      | ATP 2a3 atpase                    | CCAGGAATCACATGGATGGTGT | TGGTATGGGGTCTGGAAGT    |
| NM_009735   | B2m         | beta-2 microglobulin              | ACCGTCTACTGGGATCGAGA   | TGCTATTTCTTTCTGCGTGCAT |
| NM_007657   | Cd9         | CD9                               | CAGCGGAAACACTCAAAGC    | TTCAGGGCAGGGCTTAACCT   |
| NM_007687   | Cfl1        | Cofilin-1                         | TCCGGAAACATGGCCTCTG    | AAAAGAGCACCGCCTTCTTG   |
| NM_013885   | Clic4       | Chloride intracellular receptor 4 | AGGCTAATGAAGCGCTGGAG   | CATCTCATCGCCGTCCAGAA   |
| NM_007976   | F5          | factor 5                          | CACGATCTAGCAACTCAGGACT | GGATGCTTAGTGGTTTGTCTGC |
| NR_003258   | Gnas        | G-protein alpha subunit           | ACCTAAGGGTGCTGGAGAGT   | TTCTCACCATCGCTGTTGCT   |
| NM_018762   | Gp9         | glycoprotein 9                    | CTGTACCTGCCAGTCCTTGG   | GCACTGAACGCAGGCTATTG   |
| NM_010575   | Itga2b      | CD41/GPIIa                        | TCTTCAAGCGGAATCGACCG   | ATGGAGTTCTGAGCAAAGGCA  |
| NM_008410   | Itm2b       | integral membrane protein         | CCTGGACAAGTGCTACGTGA   | AGGTAGGTCCCAGCCTTAAT   |
| NM_172118   | Myl9        | myosin light polypeptide 9        | CTCTGCAGCAGGGAAACC     | CATGGCGAAGACATTGGACG   |

|              |          |                                            |                         |                        |
|--------------|----------|--------------------------------------------|-------------------------|------------------------|
| NM_022029    | Nrgn     | neurogranin                                | ATGGA CTGCTGCACGGAGAG   | CCGGAAACTCGCCTGGATT    |
| NM_008771    | P2rx1    | p2x<br>purinoreceptor                      | TACCATCGGCTCTGGGATTG    | GTCACGTTACCCTCCCA      |
| NM_001032378 | Pecam1   | CD31 PECAM                                 | GAGCCTCACCAAGAGAACGG    | CTCTTCTCGGGACATGGACG   |
| NM_019932    | Pf4      | Platelet factor 4                          | TCCCGAAGAAAGCGATGGAG    | CTTCAGGGTGGCTATGAGCTG  |
| NM_023785    | Ppbp     | platelet basic<br>protein                  | TGGGCTTCAGACTCAGACCT    | ATGGGTCCATGCCATCAGATTT |
| NM_024457    | Rap1b    | GTP-binding<br>protein                     | AAGGCCCGCAAAAAGTCATC    | CAGTTCTTCAGACCTGGCTC   |
| NM_022881    | Rgs18    | regulator of G-<br>protein<br>signaling 18 | GAGGCCAAAATCAGAGCGAAA   | AGCCCATTTCACTGCTTCTTCA |
| NM_080559    | Sh3bgrl3 | SH3 domain<br>binding protein              | CGGCTCCCGAGAAATCAAGT    | CTCATCTCGAAGGGCGTTGT   |
| NM_011157    | Srgn     | Serglycin                                  | AGGAACCCAACTCGCATTGT    | TCCAATGGCCACAGCTCAAT   |
| NM_021278    | Tmsb4x   | thymosin, beta<br>4                        | CCTCTGCCTTCAAAAGAAACAAT | AAGAAGGCAATGCTCGTGGA   |
| NM_001080971 | Tubb1    | tubulin 1                                  | TGGGTTCAAGGCTAGGATGAG   | TCACCTCCCAGAACTTGGCTC  |
| NM_011738    | Ywhah    | 14-3-3 epsilon                             | GCCATGAAGGCGGTGACAG     | CCATCTGCCATGGTTTTCTGC  |

Supplemental Table 1

|         |         | ATP2A3 | ALOX12 | TUBB1  | ITGA2B | GNAS   | F5     | PECAM1 | YWHAH  | CFL1   | RGS18  | P2RX1  | ITM2B  | CLIC4  | ACTB   | RAP1BP | MYL9   | TMSB4X | NRGN   | GP9    | PPBP   | SRGN   | SH3BGRL3 | CD9    | PF4    | B2M    |
|---------|---------|--------|--------|--------|--------|--------|--------|--------|--------|--------|--------|--------|--------|--------|--------|--------|--------|--------|--------|--------|--------|--------|----------|--------|--------|--------|
| Mouse 1 | <24h    | 28.133 | 26.934 | 26.484 | 26.667 | 29.742 | 29.212 | 30.345 | 26.598 | 27.915 | 28.990 | 30.310 | 28.081 | 27.452 | 23.759 | 27.471 | 26.316 | 23.312 | 25.514 | 27.743 | 24.406 | 35.827 | 26.309   | 25.264 | 25.785 | 25.830 |
| Mouse 2 | <24h    | 26.938 | 25.626 | 25.238 | 26.123 | 28.689 | 27.426 | 29.463 | 24.907 | 25.865 | 27.633 | 28.629 | 26.823 | 26.160 | 22.620 | 26.161 | 24.954 | 21.799 | 23.858 | 26.297 | 22.018 | 32.475 | 25.319   | 24.013 | 24.033 | 24.689 |
| Mouse 3 | <24h    | 27.229 | 25.840 | 25.297 | 26.223 | 28.461 | 26.696 | 29.059 | 24.423 | 25.476 | 27.220 | 28.539 | 26.631 | 25.928 | 22.388 | 25.794 | 24.637 | 21.608 | 23.876 | 25.975 | 21.517 | 31.217 | 24.989   | 23.883 | 23.936 | 24.646 |
| Mouse 4 | <24h    | 26.801 | 25.439 | 25.249 | 26.021 | 28.992 | 26.691 | 29.079 | 24.375 | 25.288 | 27.010 | 27.816 | 26.281 | 25.574 | 22.224 | 25.775 | 24.481 | 21.340 | 23.720 | 25.698 | 21.188 | 32.243 | 24.991   | 23.540 | 23.457 | 24.206 |
| Mouse 1 | 1-5days | 34.166 | 32.395 | 32.331 | 32.309 | 33.602 | 35.299 |        | 31.984 | 31.559 |        | 34.624 | 31.603 | 30.728 | 27.470 | 32.693 | 29.548 | 27.624 | 28.975 | 30.977 | 28.651 |        | 29.178   | 27.656 | 28.523 | 28.943 |
| Mouse 2 | 1-5days | 32.033 | 31.299 | 29.778 | 31.022 | 35.016 | 31.287 | 34.027 | 29.583 | 30.425 | 31.811 | 33.624 | 31.766 | 30.440 | 26.894 | 29.885 | 29.176 | 25.965 | 28.113 | 30.170 | 25.453 | 34.772 | 28.168   | 26.906 | 26.455 | 26.922 |
| Mouse 3 | 1-5days | 34.213 | 32.029 | 31.691 | 31.855 | 33.897 | 32.466 | 35.136 | 29.041 | 31.109 | 33.000 | 33.205 | 31.124 | 30.492 | 26.865 | 29.553 | 28.558 | 25.088 | 27.621 | 29.296 | 24.177 | 34.911 | 27.981   | 26.265 | 25.665 | 26.451 |
| Mouse 4 | 1-5days | 32.096 | 30.356 | 30.229 | 31.587 | 34.478 | 31.952 | 33.716 | 29.156 | 30.435 | 31.144 |        | 31.073 | 30.368 | 26.421 | 29.467 | 28.980 | 25.047 | 27.875 | 29.384 | 24.212 |        | 27.812   | 26.421 | 25.993 | 26.272 |
| Mouse 1 | Global  | 30.693 | 29.263 | 28.927 | 29.204 | 32.095 | 30.179 | 33.171 | 27.946 | 29.026 | 29.973 | 31.643 | 29.125 | 29.820 | 25.683 | 28.593 | 28.131 | 24.284 | 27.220 | 29.316 | 25.381 |        | 27.836   | 26.233 | 26.256 | 26.534 |
| Mouse 2 | Global  | 28.863 | 28.171 | 27.760 | 28.071 | 30.804 | 29.998 | 31.697 | 26.923 | 27.895 | 30.208 | 31.046 | 28.983 | 28.029 | 24.603 | 28.053 | 26.886 | 23.619 | 25.940 | 28.128 | 23.564 | 34.994 | 26.947   | 25.498 | 25.161 | 25.654 |
| Mouse 3 | Global  | 29.634 | 28.375 | 28.230 | 28.981 | 31.491 | 29.299 | 31.423 | 26.902 | 27.875 | 29.966 | 30.644 | 29.135 | 28.590 | 24.725 | 28.074 | 26.990 | 23.712 | 26.094 | 28.392 | 23.248 | 32.798 | 26.931   | 25.755 | 25.386 | 25.836 |
| Mouse 4 | Global  | 29.150 | 28.556 | 28.064 | 29.121 | 31.713 | 29.409 | 31.843 | 27.537 | 28.648 | 30.386 | 31.753 | 29.504 | 28.221 | 25.077 | 28.534 | 27.271 | 24.026 | 26.638 | 28.171 | 23.769 | 33.589 | 27.415   | 25.996 | 25.577 | 26.268 |

# Supplemental Figure S1

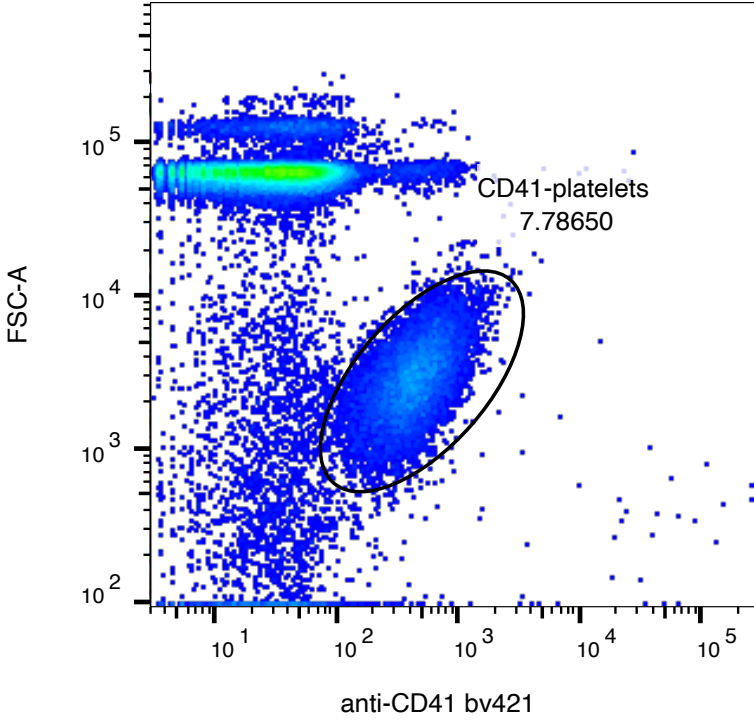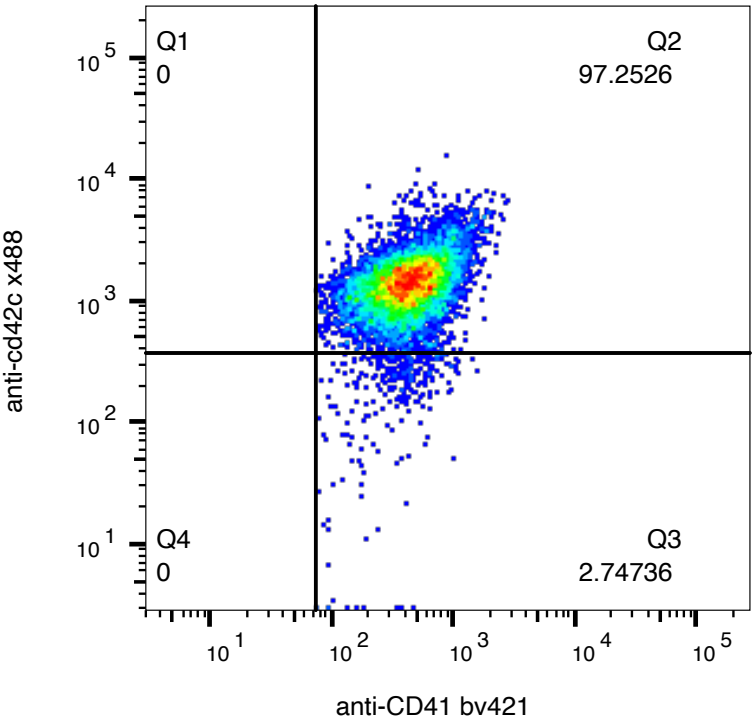

# Supplemental Figure S2

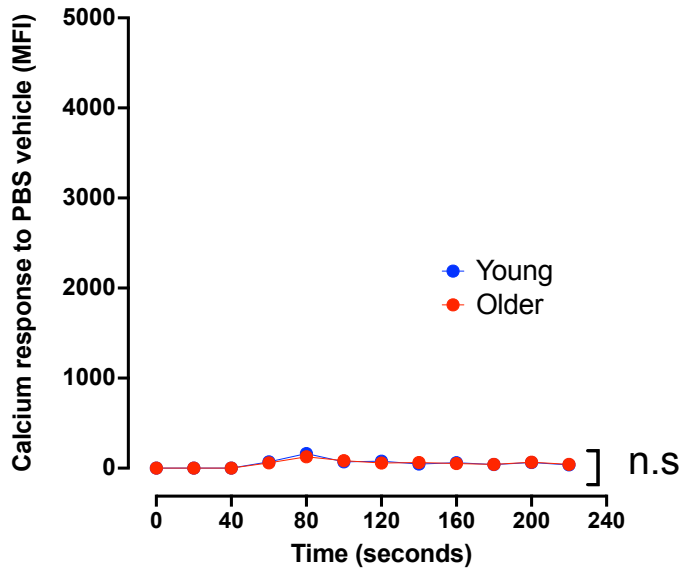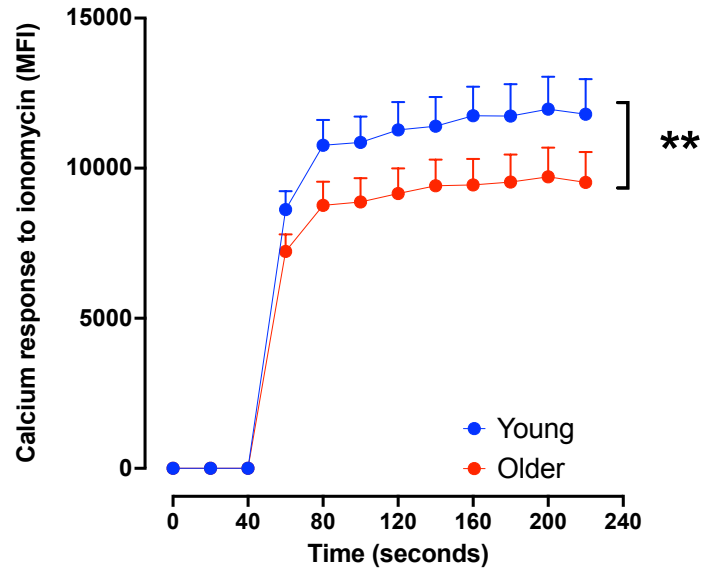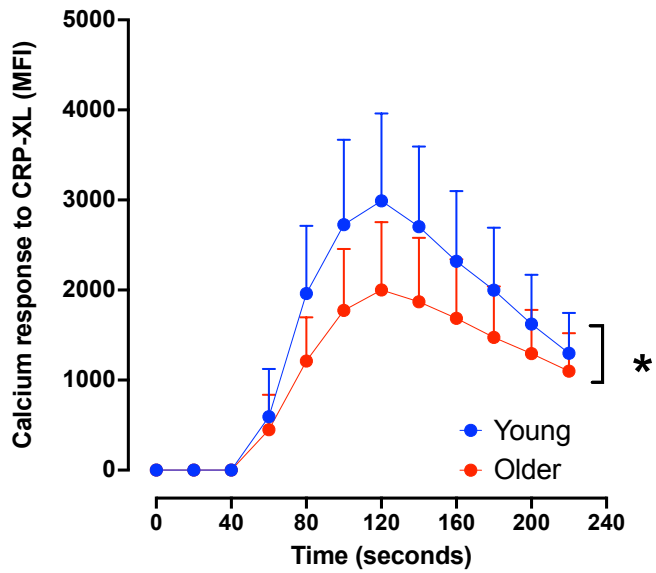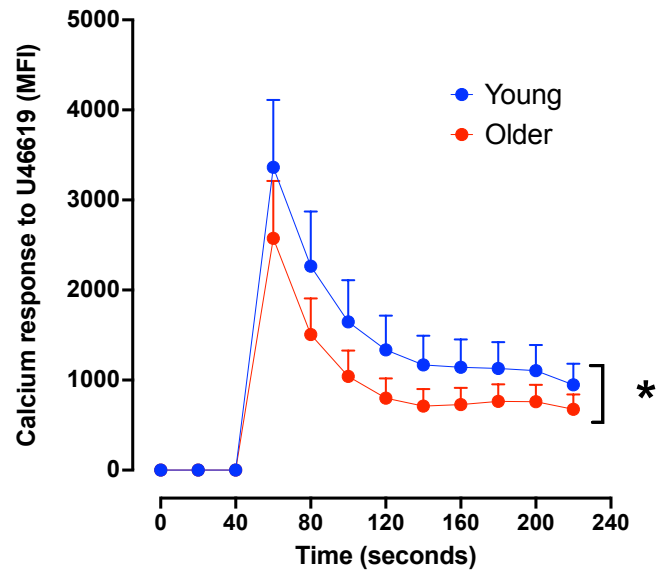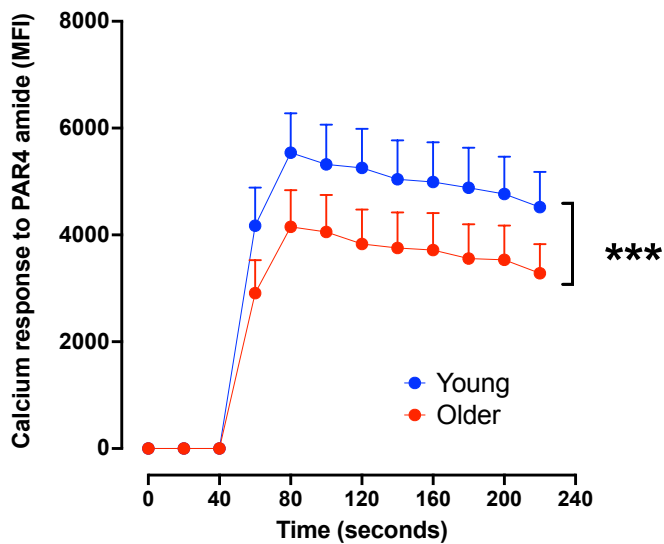

# Supplemental Figure S3

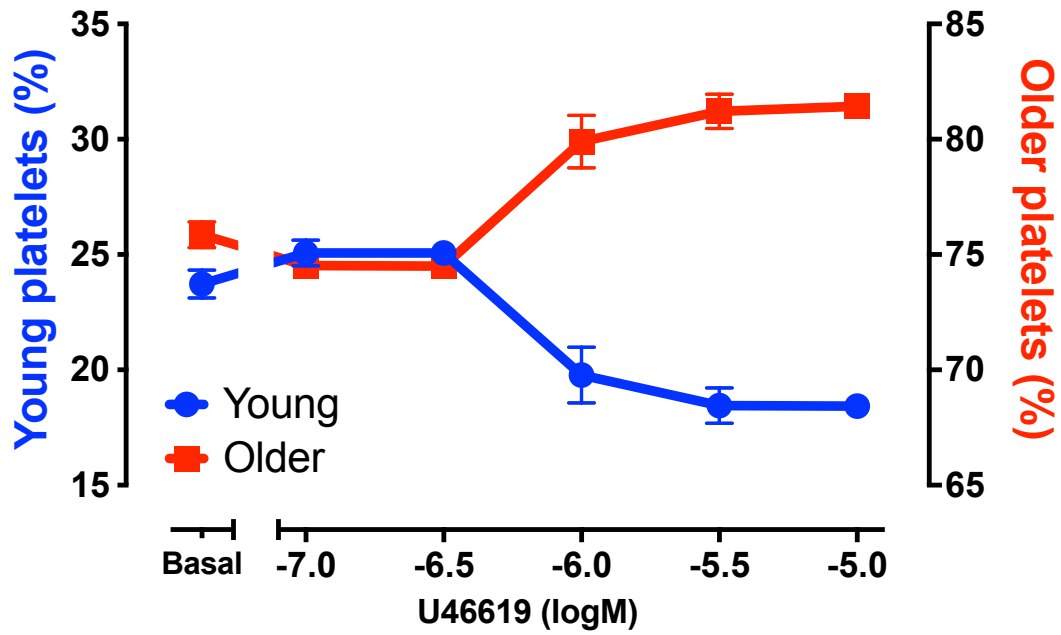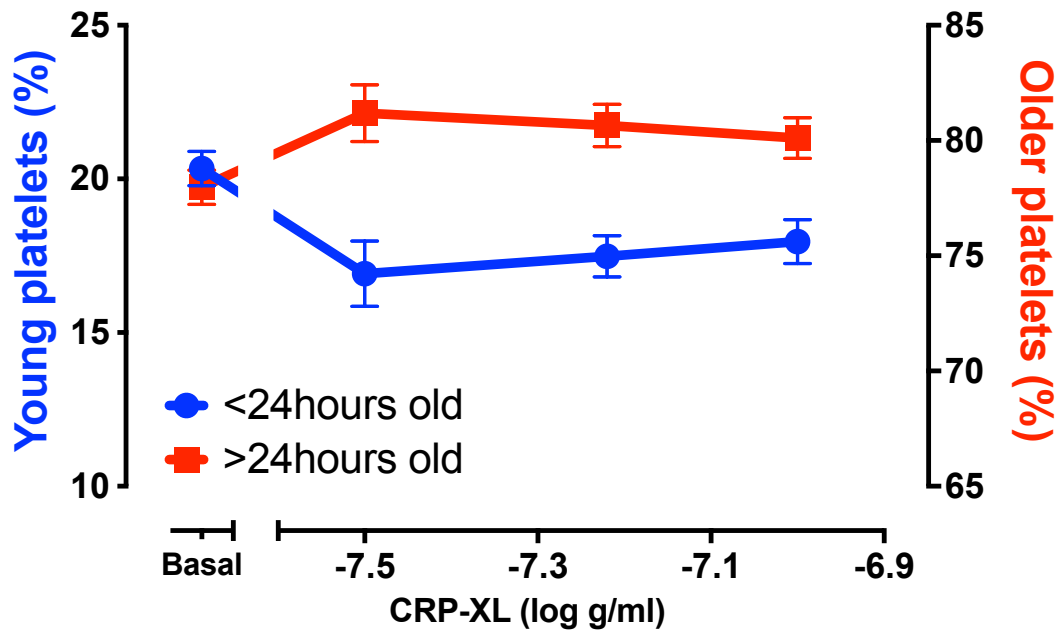



# Supplemental Figure S4

## Mouse 1

Day 1

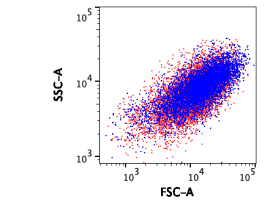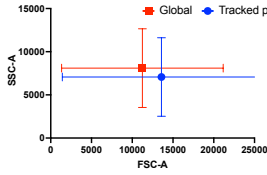

Day 2

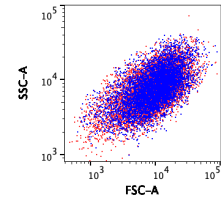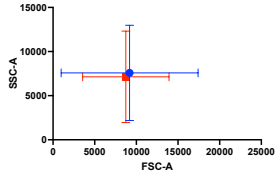

Day 3

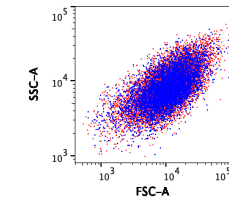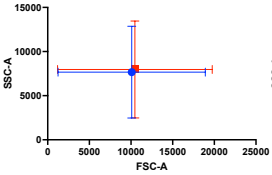

Day 4

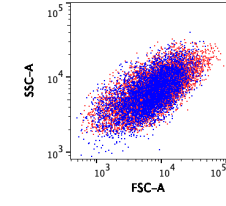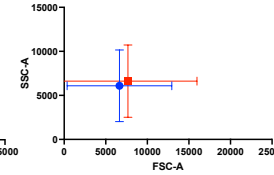

Day 5

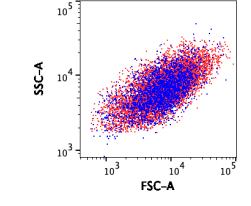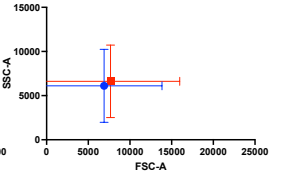

## Mouse 2

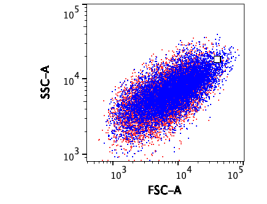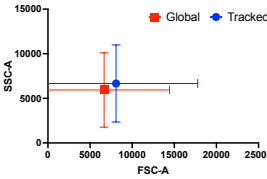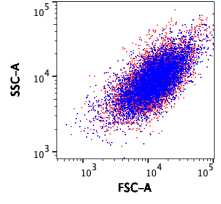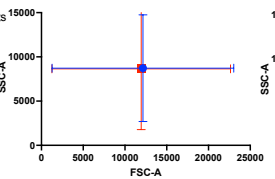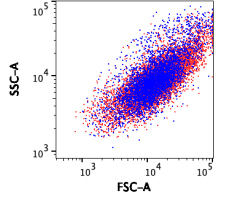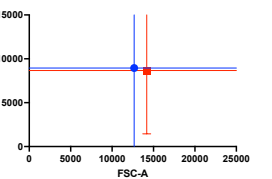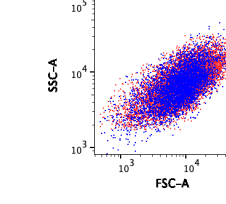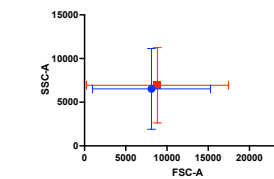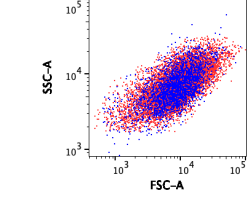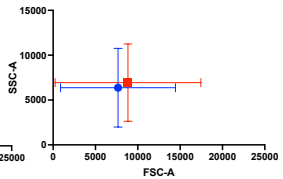

## Mouse 3

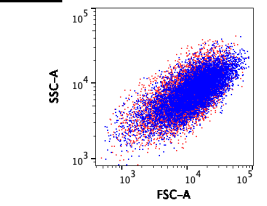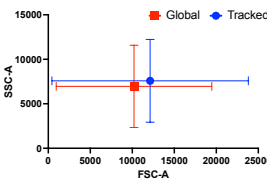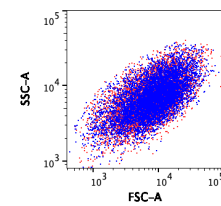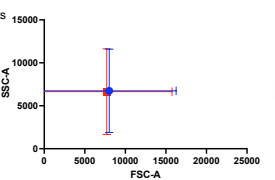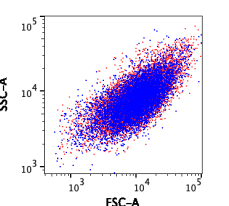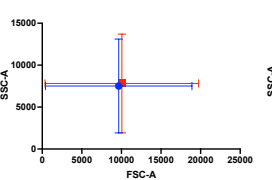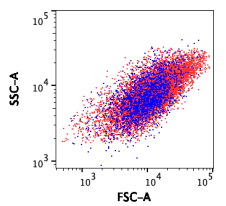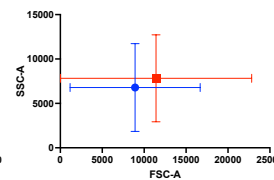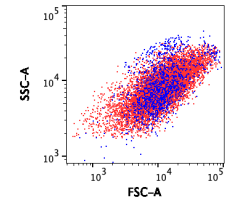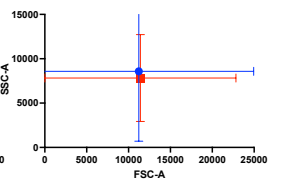

Supplement: BLOODA_ADV-2022-007099-mmc1.pdf [file BLOODA_ADV-2022-007099-mmc1.pdf]
